# Supplementary material for: Persistent and photo-stimulated luminescence in Ce3+/Cr3+ activated Y3Al2Ga3O12 phosphors and transparent phosphor-in-glass
Source: Royal Society of Chemistry journal article supplement (doi:10.1039/c6tc04140j), 2016-01-01
Supplement: c6tc04140j1.pdf [file c6tc04140j1.pdf]

## Electronic Supplementary Information

### Persistent and photo-stimulated luminescence in Ce<sup>3+</sup>/Cr<sup>3+</sup> activated Y<sub>3</sub>Al<sub>2</sub>Ga<sub>3</sub>O<sub>12</sub> phosphor and transparent phosphor-in-glass

Daqin Chen <sup>a,\*</sup>, Yang Zhou <sup>a</sup>, Wei Xu <sup>a</sup>, Jiasong Zhong <sup>a</sup>, Ping Huang <sup>b</sup>

<sup>a</sup> College of Materials & Environmental Engineering, Hangzhou Dianzi University, Hangzhou 310018, P. R. China

<sup>b</sup> State Key Laboratory of Structural Chemistry, Fujian Institute of Research on the Structure of Matter, Chinese Academy of Sciences, Fuzhou, Fujian 350002, P. R. China

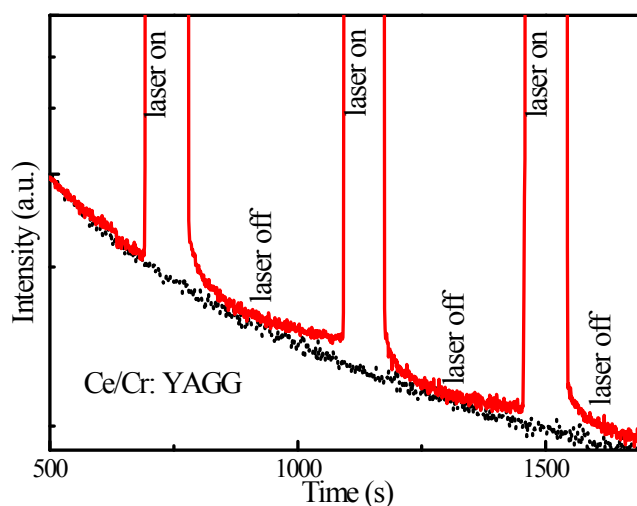

Figure S1 PSL decay curves of Ce/Cr (0.1/0.05 mol%):YAGG sample by monitoring 515 nm emission with and without the periodical excitation of 808 nm laser.

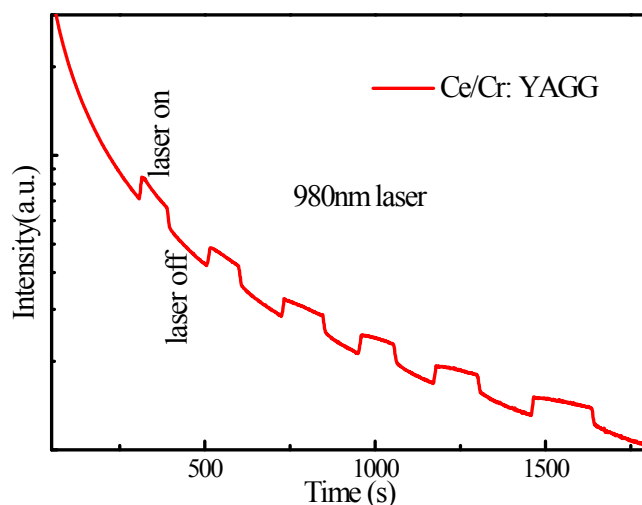

Figure S2 PSL decay curves of Ce/Cr (0.1/0.05 mol%):YAGG sample by monitoring 515 nm emission with the periodical excitation of 980 nm laser.
